# Supplementary material for: Molecular engineering of the core part of D–π–A–π–D based small acceptor molecules for efficient organic solar cells: a DFT approach
Source: Royal Society of Chemistry journal article supplement (doi:10.1039/d4nj01629g), 2024-01-01
Supplement: d4nj01629g1.pdf [file d4nj01629g1.pdf]

## Supporting Information

Molecular engineering on the core part of D- $\pi$ -A- $\pi$ -D based small acceptor molecules for efficient organic solar cells: A DFT approach

Smiti Rani Bora<sup>1</sup> and Dhruva Jyoti Kalita<sup>1,\*</sup>

Department of Chemistry, Gauhati University, Guwahati-781014, India

E-mail: [dhruvajyoti.kalita@gauhati.ac.in](mailto:dhruvajyoti.kalita@gauhati.ac.in)

Table S1 : Calculated energies of HOMO, LUMO,  $\Delta_{H-L}$ , and  $\lambda_{max}$  values of the reference compound using various functionals .

| Functional   | HOMO (eV) | LUMO (eV) | $\Delta_{H-L}$ (eV) | $\lambda_{max}$ (nm) |
|--------------|-----------|-----------|---------------------|----------------------|
| Experimental | -5.32     | -3.50     | 1.82                | 555                  |
| B3LYP        | -4.98     | -2.27     | 2.71                | 538                  |
| B3LYP-D3     | -4.97     | -2.30     | 2.67                | 546                  |
| B3PW91       | -5.10     | -2.37     | 2.73                | 533                  |
| CAM-B3LYP    | -6.24     | -1.16     | 5.08                | 394                  |
| HSEH1PBE     | -4.83     | -2.59     | 2.24                | 557                  |
| PBEPBE       | -4.34     | -2.89     | 1.45                | 781                  |
| WB97XD       | -6.86     | -0.61     | 6.25                | 385                  |

Table S2 : Coordinates of the designed compounds studied at HSEH1PBE/6-31G(d) level of theory in the angstrom unit.

### 1. Compound C1

| Atoms | Coordinates (Angstroms) |           |           |
|-------|-------------------------|-----------|-----------|
|       | X                       | Y         | Z         |
| C     | 18.759430               | -1.766546 | 1.208941  |
| C     | 17.671886               | -1.093364 | 1.726746  |
| C     | 16.421234               | -1.139189 | 1.096920  |
| C     | 18.590653               | -2.516317 | 0.039628  |
| C     | 16.256208               | -1.873418 | -0.100499 |

|   |           |           |           |
|---|-----------|-----------|-----------|
| C | 17.368542 | -2.576475 | -0.606348 |
| C | 15.301718 | -0.422596 | 1.710462  |
| C | 14.003767 | -0.607064 | 1.038726  |
| C | 13.899670 | -1.362820 | -0.153148 |
| C | 12.881601 | -0.034196 | 1.626362  |
| C | 11.610404 | -0.181667 | 1.071126  |
| C | 11.498095 | -0.981866 | -0.090641 |
| C | 12.621080 | -1.552373 | -0.679925 |
| C | 10.186104 | -1.256880 | -0.698838 |
| C | 9.039591  | -0.712258 | 0.034989  |
| C | 9.219141  | 0.087933  | 1.187339  |
| C | 8.061874  | 0.533067  | 1.859332  |
| C | 6.804923  | 0.218028  | 1.386381  |
| C | 6.613361  | -0.547746 | 0.218358  |
| C | 7.756089  | -0.999746 | -0.432036 |
| C | 5.279927  | -0.871998 | -0.279874 |
| C | 4.917596  | -1.864194 | -1.161108 |
| C | 3.533256  | -1.881462 | -1.443737 |
| C | 2.814866  | -0.899582 | -0.782932 |
| C | 1.367818  | -0.715559 | -0.783022 |
| C | 0.734404  | 0.567761  | -0.743678 |
| C | -0.698114 | 0.683946  | -0.753696 |
| C | -1.538310 | -0.485996 | -0.842899 |
| C | 0.531318  | -1.815320 | -0.774831 |
| C | -0.885205 | -1.708635 | -0.810246 |
| C | -2.987892 | -0.388319 | -0.949404 |
| C | -3.733593 | 0.658755  | -1.457887 |
| C | -5.124490 | 0.446335  | -1.409499 |
| C | 0.933135  | 2.852047  | -0.621197 |
| C | -0.482889 | 2.967232  | -0.558619 |
| C | 1.765585  | 4.045613  | -0.605923 |
| C | 1.164006  | 5.320143  | -0.485045 |
| C | -0.292182 | 5.435501  | -0.356135 |
| C | -1.100459 | 4.275399  | -0.391550 |
| C | -0.934441 | 6.675601  | -0.192023 |
| C | -2.309069 | 6.766239  | -0.067483 |
| C | -3.097513 | 5.611516  | -0.097859 |
| C | -2.493748 | 4.379457  | -0.256751 |
| C | 3.159307  | 3.928788  | -0.724065 |
| C | 2.008220  | 6.444738  | -0.490219 |
| N | 15.032900 | -1.899597 | -0.749404 |
| N | 10.485722 | 0.411539  | 1.632637  |

|   |           |           |           |
|---|-----------|-----------|-----------|
| N | 1.506672  | 1.658511  | -0.697053 |
| N | -1.257454 | 1.894301  | -0.642273 |
| S | -4.060826 | -1.657769 | -0.410588 |
| S | 3.892011  | 0.070024  | 0.175143  |
| O | 15.419019 | 0.261270  | 2.724152  |
| O | 10.066479 | -1.917438 | -1.727368 |
| H | 17.737628 | -0.507125 | 2.638357  |
| H | 17.275435 | -3.197823 | -1.488850 |
| H | 19.427344 | -3.074328 | -0.372025 |
| H | 19.724863 | -1.727174 | 1.703416  |
| H | 12.425459 | -2.168839 | -1.549855 |
| H | 13.066228 | 0.503805  | 2.549353  |
| H | 7.698113  | -1.588449 | -1.342550 |
| H | 8.138783  | 1.094530  | 2.782590  |
| H | 5.623617  | -2.566104 | -1.590673 |
| H | 3.082884  | -2.552544 | -2.169646 |
| H | -3.273876 | 1.548706  | -1.863863 |
| H | -5.850364 | 1.150654  | -1.801414 |
| H | 3.581551  | 2.934028  | -0.821595 |
| H | 1.587136  | 7.440633  | -0.407051 |
| H | -0.350932 | 7.588898  | -0.155050 |
| H | -2.773195 | 7.740322  | 0.059904  |
| H | -4.176232 | 5.681312  | 0.008419  |
| H | -3.077242 | 3.464672  | -0.269405 |
| C | -5.476504 | -0.764640 | -0.855317 |
| H | 5.941104  | 0.556668  | 1.953120  |
| C | 3.963878  | 5.051510  | -0.723378 |
| H | 5.041267  | 4.951005  | -0.818887 |
| C | 3.380690  | 6.317263  | -0.606419 |
| H | 4.003568  | 7.207548  | -0.609673 |
| C | 10.652699 | 1.379137  | 2.701215  |
| H | 9.864137  | 2.130023  | 2.640298  |
| C | 14.927126 | -2.497350 | -2.066955 |
| H | 15.850159 | -2.323647 | -2.621766 |
| H | 14.730906 | -3.575739 | -2.021902 |
| O | 0.962166  | -3.102584 | -0.731592 |
| O | -1.585681 | -2.860537 | -0.810429 |
| H | 10.631312 | 0.912191  | 3.693477  |
| H | 14.122863 | -2.014160 | -2.621697 |
| H | 11.602665 | 1.898459  | 2.574669  |
| H | 1.920156  | -3.100398 | -0.549667 |
| H | -0.946221 | -3.590947 | -0.755003 |

|   |            |           |           |
|---|------------|-----------|-----------|
| C | -6.815388  | -1.308667 | -0.658876 |
| C | -7.045452  | -2.691426 | -0.506948 |
| C | -7.929364  | -0.477481 | -0.605373 |
| C | -9.222629  | -0.976839 | -0.438688 |
| C | -9.442013  | -2.368500 | -0.315605 |
| C | -8.311829  | -3.210908 | -0.334465 |
| C | -10.335004 | -0.024859 | -0.375346 |
| C | -11.650466 | -0.625247 | -0.097709 |
| C | -11.803452 | -2.027266 | 0.022446  |
| C | -12.733870 | 0.231250  | 0.065386  |
| C | -14.010750 | -0.250996 | 0.355178  |
| C | -14.151534 | -1.648300 | 0.529427  |
| C | -13.069322 | -2.505141 | 0.363485  |
| C | -15.443717 | -2.238819 | 0.917227  |
| C | -16.510866 | -1.271011 | 1.178933  |
| C | -16.311719 | 0.114890  | 0.978539  |
| C | -17.370428 | 0.990173  | 1.296243  |
| C | -18.576706 | 0.495050  | 1.758787  |
| C | -18.781483 | -0.878592 | 1.930249  |
| C | -17.744667 | -1.743396 | 1.645130  |
| N | -10.721192 | -2.874873 | -0.176731 |
| N | -15.107618 | 0.590814  | 0.488557  |
| O | -10.187161 | 1.186311  | -0.518060 |
| O | -15.596916 | -3.452021 | 1.035975  |
| C | -10.940020 | -4.307892 | -0.232916 |
| H | -10.233576 | -4.757770 | -0.931845 |
| H | -10.830221 | -4.785591 | 0.748495  |
| H | -11.941303 | -4.508025 | -0.613957 |
| C | -14.983016 | 1.985841  | 0.110864  |
| H | -14.694930 | 2.623871  | 0.955578  |
| H | -14.235874 | 2.083623  | -0.676719 |
| H | -15.930577 | 2.339351  | -0.298397 |
| H | -7.834303  | 0.601881  | -0.674171 |
| H | -6.203813  | -3.379027 | -0.531368 |
| H | -8.414994  | -4.280019 | -0.193135 |
| H | -12.505395 | 1.287433  | -0.021137 |
| H | -13.278002 | -3.553344 | 0.544876  |
| H | -17.244177 | 2.062926  | 1.213490  |
| H | -19.371107 | 1.195989  | 2.000835  |
| H | -19.734025 | -1.252531 | 2.292279  |
| H | -17.838811 | -2.817712 | 1.771904  |

## 2. Compound C2

| Atoms | Coordinates (Angstroms) |           |           |
|-------|-------------------------|-----------|-----------|
|       | X                       | Y         | Z         |
| C     | 18.789230               | -0.406099 | 2.184184  |
| C     | 17.878239               | 0.457658  | 1.611466  |
| C     | 16.583844               | 0.035170  | 1.281361  |
| C     | 18.393460               | -1.722204 | 2.447500  |
| C     | 16.191740               | -1.302263 | 1.521086  |
| C     | 17.123142               | -2.168448 | 2.128856  |
| C     | 15.657686               | 1.006905  | 0.697678  |
| C     | 14.290855               | 0.505122  | 0.475026  |
| C     | 13.955370               | -0.843257 | 0.744050  |
| C     | 13.336675               | 1.404679  | 0.012675  |
| C     | 12.013274               | 1.020186  | -0.201977 |
| C     | 11.665236               | -0.313140 | 0.120134  |
| C     | 12.619846               | -1.213673 | 0.579121  |
| C     | 10.275610               | -0.784087 | 0.006113  |
| C     | 9.306209                | 0.243403  | -0.387438 |
| C     | 9.719632                | 1.558206  | -0.707069 |
| C     | 8.715865                | 2.495619  | -1.030365 |
| C     | 7.387912                | 2.126349  | -1.063841 |
| C     | 6.965783                | 0.812930  | -0.769916 |
| C     | 7.955692                | -0.102513 | -0.424528 |
| C     | 5.563996                | 0.421964  | -0.807886 |
| C     | 5.030314                | -0.852144 | -0.845772 |
| C     | 3.628628                | -0.882417 | -0.869349 |
| C     | 3.050322                | 0.379326  | -0.852656 |
| C     | -3.050354               | -0.379775 | -0.852852 |
| C     | -3.628642               | 0.881968  | -0.870029 |
| C     | -5.030322               | 0.851735  | -0.846447 |
| N     | 14.925341               | -1.740229 | 1.170005  |
| N     | 11.056372               | 1.901676  | -0.694080 |
| S     | -4.294429               | -1.604855 | -0.796196 |
| S     | 4.294372                | 1.604446  | -0.796492 |
| O     | 15.977813               | 2.163335  | 0.434515  |
| O     | 9.955101                | -1.944476 | 0.247418  |
| H     | 18.122412               | 1.493732  | 1.397072  |
| H     | 16.848566               | -3.184981 | 2.383410  |
| H     | 19.086633               | -2.412497 | 2.920619  |

|   |            |           |           |
|---|------------|-----------|-----------|
| H | 19.789819  | -0.070566 | 2.437926  |
| H | 12.244815  | -2.201349 | 0.821964  |
| H | 13.692483  | 2.417511  | -0.138438 |
| H | 7.715964   | -1.125294 | -0.150524 |
| H | 8.967715   | 3.528882  | -1.235753 |
| H | 5.644057   | -1.745346 | -0.876233 |
| H | 3.025240   | -1.786479 | -0.902561 |
| H | -3.025236  | 1.786007  | -0.903574 |
| H | -5.644045  | 1.744938  | -0.877248 |
| C | -5.564029  | -0.422354 | -0.808036 |
| H | 6.651552   | 2.880399  | -1.330646 |
| C | 11.476349  | 3.199741  | -1.189493 |
| H | 10.825020  | 3.507390  | -2.008381 |
| C | 14.603022  | -3.152509 | 1.250657  |
| H | 15.485076  | -3.743152 | 0.999021  |
| H | 14.246616  | -3.443317 | 2.246533  |
| H | 11.461404  | 3.968350  | -0.407221 |
| H | 13.835208  | -3.393169 | 0.515658  |
| H | 12.485858  | 3.124480  | -1.593354 |
| C | -6.965823  | -0.813241 | -0.769917 |
| C | -7.388043  | -2.126665 | -1.063676 |
| C | -7.955664  | 0.102311  | -0.424603 |
| C | -9.306201  | -0.243512 | -0.387420 |
| C | -9.719708  | -1.558324 | -0.706894 |
| C | -8.716022  | -2.495848 | -1.030120 |
| C | -10.275534 | 0.784064  | 0.006070  |
| C | -11.665184 | 0.313212  | 0.120170  |
| C | -12.013310 | -1.020120 | -0.201812 |
| C | -12.619717 | 1.213868  | 0.579093  |
| C | -13.955267 | 0.843572  | 0.744055  |
| C | -14.290838 | -0.504819 | 0.475182  |
| C | -13.336731 | -1.404499 | 0.012919  |
| C | -15.657709 | -1.006485 | 0.697865  |
| C | -16.583830 | -0.034614 | 1.281380  |
| C | -16.191638 | 1.302817  | 1.520958  |
| C | -17.122985 | 2.169137  | 2.128610  |
| C | -18.393357 | 1.723028  | 2.447237  |
| C | -18.789221 | 0.406927  | 2.184050  |
| C | -17.878263 | -0.456976 | 1.611498  |
| N | -11.056472 | -1.901719 | -0.693838 |
| N | -14.925186 | 1.740650  | 1.169901  |
| O | -9.954938  | 1.944443  | 0.247310  |

|   |            |           |           |
|---|------------|-----------|-----------|
| O | -15.977900 | -2.162931 | 0.434847  |
| C | -11.476488 | -3.199805 | -1.189167 |
| H | -10.825356 | -3.507373 | -2.008254 |
| H | -11.461248 | -3.968440 | -0.406927 |
| H | -12.486117 | -3.124622 | -1.592731 |
| C | -14.602818 | 3.152926  | 1.250447  |
| H | -14.246714 | 3.443860  | 2.246392  |
| H | -13.834768 | 3.393449  | 0.515653  |
| H | -15.484773 | 3.743577  | 0.998452  |
| H | -7.715871  | 1.125113  | -0.150734 |
| H | -6.651748  | -2.880795 | -1.330432 |
| H | -8.967979  | -3.529108 | -1.235382 |
| H | -12.244570 | 2.201527  | 0.821831  |
| H | -13.692639 | -2.417317 | -0.138062 |
| H | -16.848338 | 3.185675  | 2.383072  |
| H | -19.086513 | 2.413448  | 2.920198  |
| H | -19.789863 | 0.071520  | 2.437748  |
| H | -18.122484 | -1.493065 | 1.397226  |
| C | 0.395649   | -1.750825 | -0.872739 |
| C | 0.626498   | -0.328844 | -0.876522 |
| C | -0.626530  | 0.328358  | -0.876671 |
| C | -1.641825  | -0.625363 | -0.866450 |
| C | 1.641788   | 0.624891  | -0.866410 |
| C | -0.395691  | 1.750342  | -0.873212 |
| N | 1.024791   | 1.865347  | -0.865641 |
| N | -1.024837  | -1.865825 | -0.865352 |
| O | -1.135990  | 2.726671  | -0.878590 |
| O | 1.135945   | -2.727160 | -0.877759 |
| C | 1.631428   | 3.172679  | -0.866656 |
| H | 2.254470   | 3.327050  | -1.753513 |
| H | 0.804215   | 3.886256  | -0.882509 |
| H | 2.229942   | 3.340974  | 0.034547  |
| C | -1.631463  | -3.173162 | -0.866266 |
| H | -2.254741  | -3.327474 | -1.752960 |
| H | -0.804249  | -3.886731 | -0.882363 |
| H | -2.229741  | -3.341528 | 0.035088  |

### 3. Compound C3

| Atoms | Coordinates (Angstroms) |   |   |
|-------|-------------------------|---|---|
|       | X                       | Y | Z |

---

|   |            |           |           |
|---|------------|-----------|-----------|
| C | -21.788275 | 0.509627  | 0.661989  |
| C | -20.773730 | -0.416273 | 0.529149  |
| C | -19.449023 | -0.016636 | 0.309263  |
| C | -21.470148 | 1.870217  | 0.586821  |
| C | -19.130579 | 1.357372  | 0.205575  |
| C | -20.171705 | 2.294199  | 0.366187  |
| C | -18.415010 | -1.047482 | 0.200545  |
| C | -17.039541 | -0.535959 | 0.072094  |
| C | -16.782599 | 0.853075  | -0.014736 |
| C | -16.001332 | -1.460782 | 0.062868  |
| C | -14.667687 | -1.061753 | -0.028715 |
| C | -14.408038 | 0.329231  | -0.058420 |
| C | -15.446471 | 1.253896  | -0.052409 |
| C | -13.029473 | 0.844516  | -0.070933 |
| C | -11.986917 | -0.181311 | 0.027594  |
| C | -12.310642 | -1.558117 | 0.039853  |
| C | -11.248588 | -2.476469 | 0.174812  |
| C | -9.942996  | -2.039623 | 0.264906  |
| C | -9.606439  | -0.671288 | 0.223403  |
| C | -10.656627 | 0.232550  | 0.104365  |
| C | -8.227734  | -0.207838 | 0.318793  |
| C | -7.768636  | 1.025306  | 0.722738  |
| C | -6.362999  | 1.142472  | 0.695902  |
| C | -5.723314  | -0.001632 | 0.271544  |
| C | 5.751673   | -0.132170 | -0.674505 |
| C | 6.406505   | -1.255156 | -1.130414 |
| C | 7.810701   | -1.116252 | -1.157364 |
| N | -17.830171 | 1.763879  | -0.042457 |
| N | -13.622211 | -1.976871 | -0.072950 |
| S | 6.901673   | 1.102097  | -0.250516 |
| S | -6.890436  | -1.231230 | -0.119724 |
| O | -18.661676 | -2.250277 | 0.239877  |
| O | -12.779665 | 2.045524  | -0.131268 |
| H | -20.956684 | -1.484728 | 0.592158  |
| H | -19.965668 | 3.357628  | 0.350381  |
| H | -22.249574 | 2.616915  | 0.712832  |
| H | -22.811934 | 0.192054  | 0.833495  |
| H | -15.139746 | 2.293659  | -0.050813 |
| H | -16.304947 | -2.497065 | 0.158892  |
| H | -10.481942 | 1.302886  | 0.051602  |
| H | -11.442192 | -3.539438 | 0.252773  |



|   |            |           |           |
|---|------------|-----------|-----------|
| H | -8.429556  | 1.815637  | 1.060907  |
| H | -5.827784  | 2.034044  | 1.005890  |
| H | 5.883338   | -2.145164 | -1.464503 |
| H | 8.481247   | -1.888304 | -1.518108 |
| C | 8.253327   | 0.112195  | -0.721188 |
| H | -9.157670  | -2.779406 | 0.399604  |
| C | -13.919310 | -3.387902 | -0.236250 |
| H | -13.126793 | -3.863538 | -0.815424 |
| C | -17.554209 | 3.158311  | -0.331971 |
| H | -18.385224 | 3.585202  | -0.895513 |
| H | -17.394116 | 3.750371  | 0.577622  |
| H | -14.024407 | -3.905531 | 0.725067  |
| H | -16.667697 | 3.230241  | -0.961714 |
| H | -14.843708 | -3.500949 | -0.802425 |
| C | 9.623126   | 0.600337  | -0.620563 |
| C | 9.922025   | 1.976486  | -0.554513 |
| C | 10.699300  | -0.279890 | -0.575860 |
| C | 12.019465  | 0.165405  | -0.494424 |
| C | 12.307520  | 1.549610  | -0.451733 |
| C | 11.216899  | 2.443260  | -0.466372 |
| C | 13.089533  | -0.835301 | -0.434557 |
| C | 14.441350  | -0.286281 | -0.238622 |
| C | 14.661861  | 1.110871  | -0.190642 |
| C | 15.490620  | -1.184218 | -0.075454 |
| C | 16.797989  | -0.748968 | 0.146523  |
| C | 17.006921  | 0.646714  | 0.252078  |
| C | 15.959103  | 1.544666  | 0.083420  |
| C | 18.337046  | 1.193895  | 0.570175  |
| C | 19.367814  | 0.190518  | 0.842437  |
| C | 19.100543  | -1.191963 | 0.710376  |
| C | 20.128648  | -2.100766 | 1.033559  |
| C | 21.370161  | -1.642280 | 1.437111  |
| C | 21.641433  | -0.273503 | 1.541495  |
| C | 20.635929  | 0.625311  | 1.249537  |
| N | 13.612094  | 1.999367  | -0.391159 |
| N | 17.860284  | -1.633041 | 0.280292  |
| O | 12.878490  | -2.042498 | -0.515289 |
| O | 18.547255  | 2.402848  | 0.627759  |
| C | 13.895653  | 3.416276  | -0.524244 |
| H | 13.179635  | 3.869358  | -1.211123 |
| H | 13.855299  | 3.941534  | 0.437884  |
| H | 14.886275  | 3.548882  | -0.958935 |

|   |           |           |           |
|---|-----------|-----------|-----------|
| C | 17.661949 | -3.036027 | -0.030511 |
| H | 17.381001 | -3.624203 | 0.851905  |
| H | 16.880874 | -3.134192 | -0.784301 |
| H | 18.576808 | -3.447686 | -0.459392 |
| H | 10.554786 | -1.355964 | -0.584246 |
| H | 9.112850  | 2.702272  | -0.578317 |
| H | 11.374876 | 3.511851  | -0.386217 |
| H | 15.212245 | -2.231566 | -0.103547 |
| H | 16.220709 | 2.589190  | 0.208971  |
| H | 19.952007 | -3.169129 | 1.002026  |
| H | 22.139905 | -2.367949 | 1.685703  |
| H | 22.620848 | 0.071284  | 1.857782  |
| H | 20.782550 | 1.698541  | 1.325317  |
| C | -4.309589 | -0.242794 | 0.128877  |
| C | -3.649640 | -1.430170 | -0.045353 |
| C | -2.235728 | -1.286433 | -0.147463 |
| C | -1.826101 | 0.050764  | -0.042737 |
| C | -1.252208 | -2.292706 | -0.324521 |
| C | 0.070456  | -1.950795 | -0.393214 |
| C | 0.495013  | -0.596945 | -0.288451 |
| C | -0.467913 | 0.442422  | -0.107250 |
| C | 1.853263  | -0.204163 | -0.353574 |
| C | 2.260366  | 1.133839  | -0.247373 |
| C | -0.045303 | 1.796722  | -0.001634 |
| C | 1.276736  | 2.139653  | -0.069541 |
| C | 3.673182  | 1.281216  | -0.350892 |
| C | 4.336181  | 0.096082  | -0.527998 |
| S | -3.191776 | 1.108416  | 0.161716  |
| S | 3.222227  | -1.258167 | -0.561035 |
| H | -4.157789 | -2.388523 | -0.082023 |
| H | 4.178686  | 2.240989  | -0.315685 |
| H | -1.557743 | -3.332080 | -0.405532 |
| H | 0.820324  | -2.725576 | -0.530610 |
| H | -0.796162 | 2.570472  | 0.136064  |
| H | 1.582127  | 3.178990  | 0.012296  |

#### 4. Compound C4

| Atoms | Coordinates (Angstroms) |   |   |
|-------|-------------------------|---|---|
|       | X                       | Y | Z |

---

|   |           |           |           |
|---|-----------|-----------|-----------|
| C | 18.853124 | -1.216067 | 0.618110  |
| C | 17.869268 | -0.254496 | 0.509953  |
| C | 16.529412 | -0.605577 | 0.299280  |
| C | 18.487858 | -2.563826 | 0.527549  |
| C | 16.163157 | -1.966305 | 0.179119  |
| C | 17.173426 | -2.940120 | 0.315493  |
| C | 15.530075 | 0.461457  | 0.217620  |
| C | 14.136843 | -0.000797 | 0.095923  |
| C | 13.831821 | -1.378661 | -0.010072 |
| C | 13.130619 | 0.958636  | 0.111801  |
| C | 11.783246 | 0.606850  | 0.025856  |
| C | 11.476109 | -0.773913 | -0.025747 |
| C | 12.482614 | -1.733162 | -0.043083 |
| C | 10.080709 | -1.242007 | -0.041140 |
| C | 9.073789  | -0.183651 | 0.075894  |
| C | 9.444343  | 1.180622  | 0.115290  |
| C | 8.414542  | 2.131608  | 0.271986  |
| C | 7.094509  | 1.738832  | 0.349980  |
| C | 6.709500  | 0.384025  | 0.275609  |
| C | 7.729484  | -0.552404 | 0.142421  |
| C | 5.313609  | -0.029301 | 0.344467  |
| C | 4.811885  | -1.267968 | 0.684539  |
| C | 3.408733  | -1.327271 | 0.644603  |
| C | 2.803819  | -0.139382 | 0.272304  |
| C | -2.959679 | 0.638621  | -0.330293 |
| C | -3.715120 | 1.775604  | -0.539381 |
| C | -5.099307 | 1.526474  | -0.636992 |
| N | 14.847361 | -2.324374 | -0.061388 |
| N | 10.769464 | 1.557267  | 0.006697  |
| S | -4.008757 | -0.756376 | -0.245650 |
| S | 4.023187  | 1.071304  | -0.023881 |
| O | 15.818558 | 1.654336  | 0.272623  |
| O | 9.791138  | -2.433152 | -0.120356 |
| H | 18.089089 | 0.806121  | 0.586206  |
| H | 16.931028 | -3.995583 | 0.287513  |
| H | 19.242534 | -3.338418 | 0.634492  |
| H | 19.888820 | -0.935968 | 0.782530  |
| H | 12.140656 | -2.761777 | -0.056944 |
| H | 13.470396 | 1.982254  | 0.221465  |
| H | 7.518875  | -1.614963 | 0.068461  |
| H | 8.644826  | 3.185144  | 0.374736  |
| H | 5.438451  | -2.101245 | 0.982984  |

|   |            |           |           |
|---|------------|-----------|-----------|
| H | 2.850768   | -2.219638 | 0.904877  |
| H | -3.262648  | 2.753762  | -0.628840 |
| H | -5.832870  | 2.302218  | -0.827512 |
| C | -5.437084  | 0.198241  | -0.505645 |
| H | 6.335405   | 2.502661  | 0.498669  |
| C | 11.113290  | 2.960423  | -0.130110 |
| H | 10.332377  | 3.474772  | -0.691540 |
| C | 14.519885  | -3.703921 | -0.368138 |
| H | 15.333241  | -4.153818 | -0.939400 |
| H | 14.340082  | -4.301399 | 0.534220  |
| H | 11.244462  | 3.453595  | 0.840829  |
| H | 13.629802  | -3.735203 | -0.996339 |
| H | 12.036029  | 3.054319  | -0.702599 |
| C | -6.759382  | -0.410745 | -0.563995 |
| C | -6.938431  | -1.781213 | -0.843067 |
| C | -7.908470  | 0.341381  | -0.341120 |
| C | -9.186082  | -0.215439 | -0.415468 |
| C | -9.353237  | -1.585315 | -0.725972 |
| C | -8.189098  | -2.357645 | -0.917885 |
| C | -10.339546 | 0.648472  | -0.145864 |
| C | -11.641628 | -0.038397 | -0.143919 |
| C | -11.741406 | -1.414996 | -0.457000 |
| C | -12.767344 | 0.702932  | 0.198128  |
| C | -14.036407 | 0.124334  | 0.249903  |
| C | -14.126505 | -1.263730 | -0.010283 |
| C | -13.001789 | -2.004277 | -0.355727 |
| C | -15.410901 | -1.975786 | 0.101920  |
| C | -16.529696 | -1.158944 | 0.575568  |
| C | -16.379835 | 0.227591  | 0.810613  |
| C | -17.489184 | 0.939795  | 1.310257  |
| C | -18.694923 | 0.297806  | 1.530444  |
| C | -18.849383 | -1.068661 | 1.271613  |
| C | -17.764028 | -1.781090 | 0.804143  |
| N | -10.614725 | -2.138582 | -0.829425 |
| N | -15.173226 | 0.859265  | 0.559515  |
| O | -10.233150 | 1.849804  | 0.086072  |
| O | -15.517646 | -3.171706 | -0.157959 |
| C | -10.772176 | -3.492987 | -1.325983 |
| H | -10.004698 | -3.699808 | -2.072884 |
| H | -10.708525 | -4.240715 | -0.525931 |
| H | -11.737816 | -3.587381 | -1.822607 |
| C | -15.088263 | 2.305892  | 0.623915  |

|   |            |           |           |
|---|------------|-----------|-----------|
| H | -14.869015 | 2.667376  | 1.636252  |
| H | -14.307896 | 2.654290  | -0.052606 |
| H | -16.028182 | 2.742254  | 0.283027  |
| H | -7.856610  | 1.394310  | -0.081181 |
| H | -6.068748  | -2.410796 | -1.013800 |
| H | -8.255205  | -3.422334 | -1.106223 |
| H | -12.579713 | 1.741603  | 0.445514  |
| H | -13.175318 | -3.063303 | -0.509373 |
| H | -17.404875 | 1.990783  | 1.559113  |
| H | -19.529431 | 0.873073  | 1.922314  |
| H | -19.801960 | -1.558338 | 1.447624  |
| H | -17.819039 | -2.845870 | 0.598513  |
| C | 1.382389   | 0.096133  | 0.112038  |
| C | 0.827409   | 1.401565  | -0.132400 |
| C | -0.615903  | 1.605199  | -0.278755 |
| C | -1.526260  | 0.489028  | -0.185828 |
| C | 0.458242   | -0.930518 | 0.179745  |
| C | -0.929747  | -0.738608 | 0.041668  |
| N | 1.573999   | 2.485619  | -0.242925 |
| N | -0.991336  | 2.853942  | -0.500966 |
| H | 0.477889   | 3.847824  | -0.540264 |
| H | 0.805136   | -1.946471 | 0.337586  |
| H | -1.557875  | -1.622652 | 0.115416  |

## 5. Compound C5

| Atoms | Coordinates (Angstroms) |           |           |
|-------|-------------------------|-----------|-----------|
|       | X                       | Y         | Z         |
| C     | -18.932223              | -0.740772 | -0.142969 |
| C     | -17.908932              | 0.183905  | -0.188917 |
| C     | -16.582550              | -0.185908 | 0.069614  |
| C     | -18.621690              | -2.072063 | 0.155931  |
| C     | -16.271102              | -1.525611 | 0.398591  |
| C     | -17.321763              | -2.465495 | 0.419914  |
| C     | -15.539485              | 0.837822  | -0.019372 |
| C     | -14.164745              | 0.340628  | 0.160785  |
| C     | -13.915248              | -1.015850 | 0.477835  |
| C     | -13.119877              | 1.240795  | -0.015185 |
| C     | -11.787171              | 0.846588  | 0.107646  |
| C     | -11.536299              | -0.521246 | 0.370605  |

|   |            |           |           |
|---|------------|-----------|-----------|
| C | -12.581588 | -1.420349 | 0.551558  |
| C | -10.160690 | -1.042734 | 0.433111  |
| C | -9.115094  | -0.064214 | 0.119669  |
| C | -9.430851  | 1.292920  | -0.122493 |
| C | -8.370178  | 2.159637  | -0.457235 |
| C | -7.072083  | 1.697082  | -0.520033 |
| C | -6.740109  | 0.353051  | -0.251417 |
| C | -7.790745  | -0.501843 | 0.065811  |
| C | -5.367258  | -0.132111 | -0.320276 |
| C | -4.931174  | -1.428985 | -0.487467 |
| C | -3.529907  | -1.547051 | -0.517982 |
| C | -2.862432  | -0.345158 | -0.374214 |
| C | 2.931111   | 0.429322  | -0.333462 |
| C | 3.659068   | 1.601616  | -0.358265 |
| C | 5.054702   | 1.399536  | -0.355199 |
| N | -14.968425 | -1.897041 | 0.685261  |
| N | -10.734982 | 1.742149  | -0.037570 |
| S | 4.011840   | -0.938973 | -0.290196 |
| S | -4.015169  | 0.949620  | -0.195304 |
| O | -15.779764 | 2.019408  | -0.254570 |
| O | -9.918176  | -2.217216 | 0.698552  |
| H | -18.086260 | 1.227995  | -0.428758 |
| H | -17.122279 | -3.513052 | 0.610645  |
| H | -19.408436 | -2.821498 | 0.173409  |
| H | -19.957066 | -0.446537 | -0.346205 |
| H | -12.283560 | -2.448676 | 0.721811  |
| H | -13.416967 | 2.249248  | -0.279905 |
| H | -7.620679  | -1.548885 | 0.297486  |
| H | -8.561194  | 3.194563  | -0.714250 |
| H | -5.605576  | -2.268577 | -0.615160 |
| H | -3.020595  | -2.493034 | -0.663194 |
| H | 3.181721   | 2.573134  | -0.387943 |
| H | 5.775213   | 2.208979  | -0.399058 |
| C | 5.424692   | 0.073489  | -0.325092 |
| H | -6.289121  | 2.392052  | -0.812961 |
| C | -11.016821 | 3.163463  | -0.108845 |
| H | -10.198692 | 3.721240  | 0.348651  |
| C | -14.693933 | -3.224075 | 1.202829  |
| H | -15.518284 | -3.544505 | 1.841555  |
| H | -14.548464 | -3.962376 | 0.404495  |
| H | -11.157760 | 3.509617  | -1.140205 |
| H | -13.798745 | -3.193791 | 1.823902  |

|   |            |           |           |
|---|------------|-----------|-----------|
| H | -11.917217 | 3.384099  | 0.464583  |
| C | 6.766401   | -0.494851 | -0.312525 |
| C | 7.014896   | -1.830042 | -0.691845 |
| C | 7.868572   | 0.267368  | 0.061070  |
| C | 9.163643   | -0.253111 | 0.069292  |
| C | 9.394794   | -1.603821 | -0.280662 |
| C | 8.282270   | -2.374125 | -0.677441 |
| C | 10.267656  | 0.632103  | 0.451796  |
| C | 11.607545  | 0.030432  | 0.352240  |
| C | 11.773641  | -1.326224 | -0.015618 |
| C | 12.705604  | 0.843864  | 0.609610  |
| C | 14.011601  | 0.361312  | 0.515840  |
| C | 14.177903  | -0.979940 | 0.095992  |
| C | 13.080181  | -1.794058 | -0.159310 |
| C | 15.520268  | -1.550749 | -0.108467 |
| C | 16.625959  | -0.608476 | 0.074316  |
| C | 16.396467  | 0.719762  | 0.502578  |
| C | 17.505408  | 1.583596  | 0.610094  |
| C | 18.781583  | 1.126136  | 0.333708  |
| C | 19.010284  | -0.196197 | -0.062955 |
| C | 17.929969  | -1.044621 | -0.194357 |
| N | 10.668098  | -2.138643 | -0.236257 |
| N | 15.115886  | 1.153340  | 0.801678  |
| O | 10.098160  | 1.796695  | 0.803481  |
| O | 15.687124  | -2.723375 | -0.434490 |
| C | 10.860377  | -3.564200 | -0.426951 |
| H | 10.009011  | -4.106310 | -0.013435 |
| H | 10.979130  | -3.830393 | -1.484410 |
| H | 11.744861  | -3.888069 | 0.121355  |
| C | 14.919724  | 2.451834  | 1.418036  |
| H | 14.837571  | 3.257789  | 0.678269  |
| H | 14.013630  | 2.433706  | 2.023498  |
| H | 15.751664  | 2.666210  | 2.090522  |
| H | 7.764027   | 1.301251  | 0.375765  |
| H | 6.190325   | -2.451299 | -1.032480 |
| H | 8.408358   | -3.394857 | -1.017559 |
| H | 12.471030  | 1.872736  | 0.857584  |
| H | 13.317336  | -2.795695 | -0.499483 |
| H | 17.370977  | 2.624288  | 0.879135  |
| H | 19.615013  | 1.818187  | 0.419767  |
| H | 20.017388  | -0.541428 | -0.274437 |
| H | 18.043127  | -2.076695 | -0.512317 |

|   |           |           |           |
|---|-----------|-----------|-----------|
| C | -1.429103 | -0.128445 | -0.355322 |
| C | -0.824031 | 1.158037  | -0.324461 |
| C | 0.584454  | 1.347550  | -0.316449 |
| C | 1.494939  | 0.252213  | -0.339433 |
| C | -0.515709 | -1.178025 | -0.370976 |
| C | 0.877228  | -0.994069 | -0.367429 |
| N | -1.407992 | 2.369451  | -0.290688 |
| N | 0.822642  | 2.672598  | -0.277744 |
| H | -0.883572 | -2.198971 | -0.381925 |
| H | 1.496733  | -1.887118 | -0.387023 |
| N | -0.385205 | 3.195239  | -0.260122 |
| C | -0.579307 | 4.626456  | -0.279444 |
| H | -0.579905 | 4.990896  | -1.310718 |
| H | -1.538323 | 4.844376  | 0.189217  |
| H | 0.236879  | 5.090707  | 0.273669  |

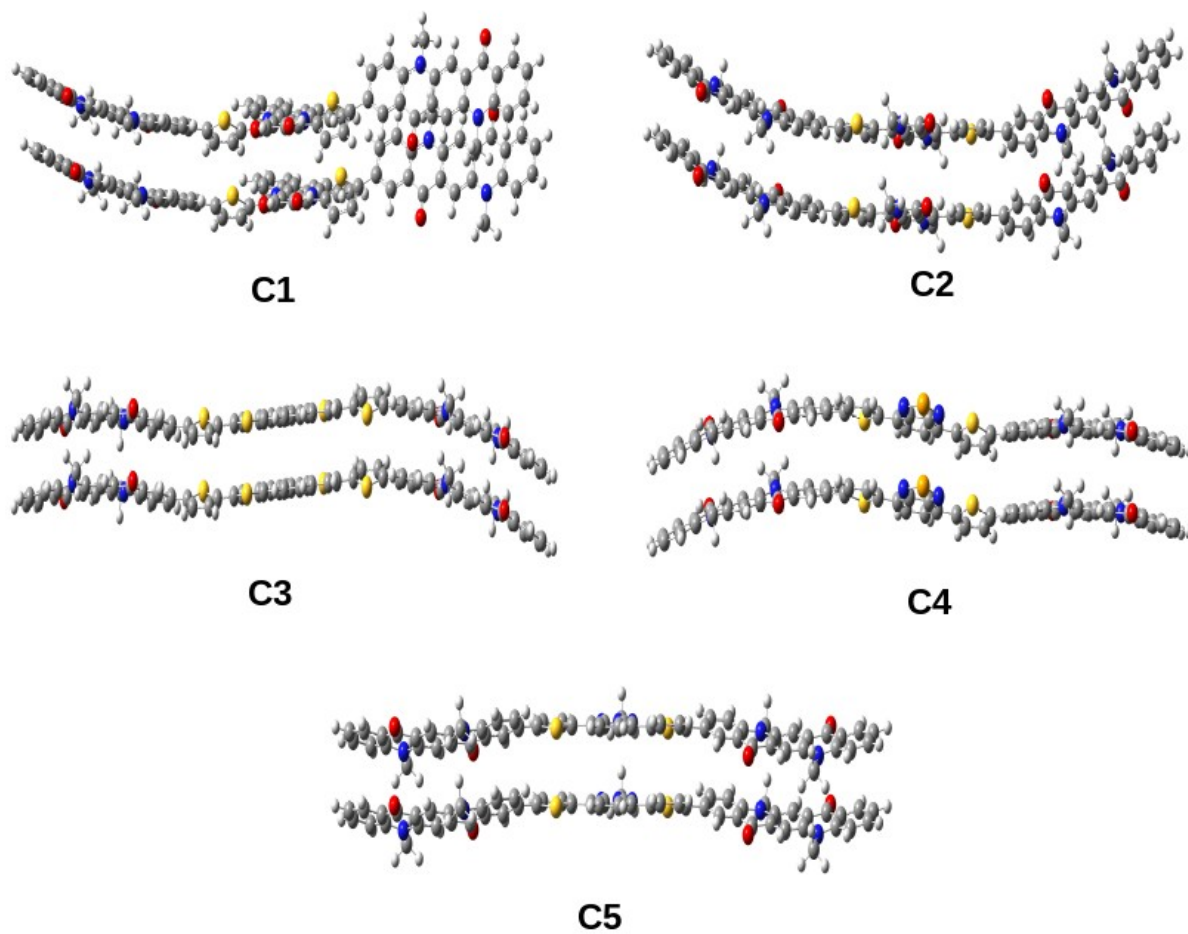

Fig. S1 : Optimized structures of the studied compounds in the  $\pi$ -stacked orientation.



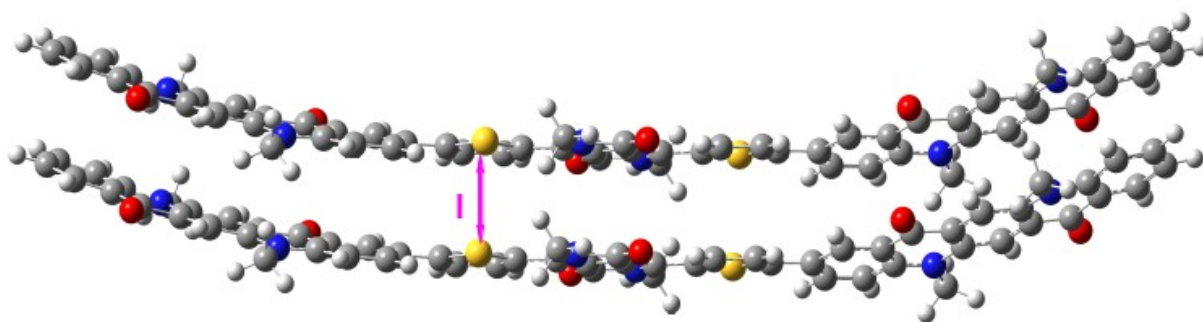

Fig. S2 : Representative structure of two stacked molecules along with distance  $l$ .

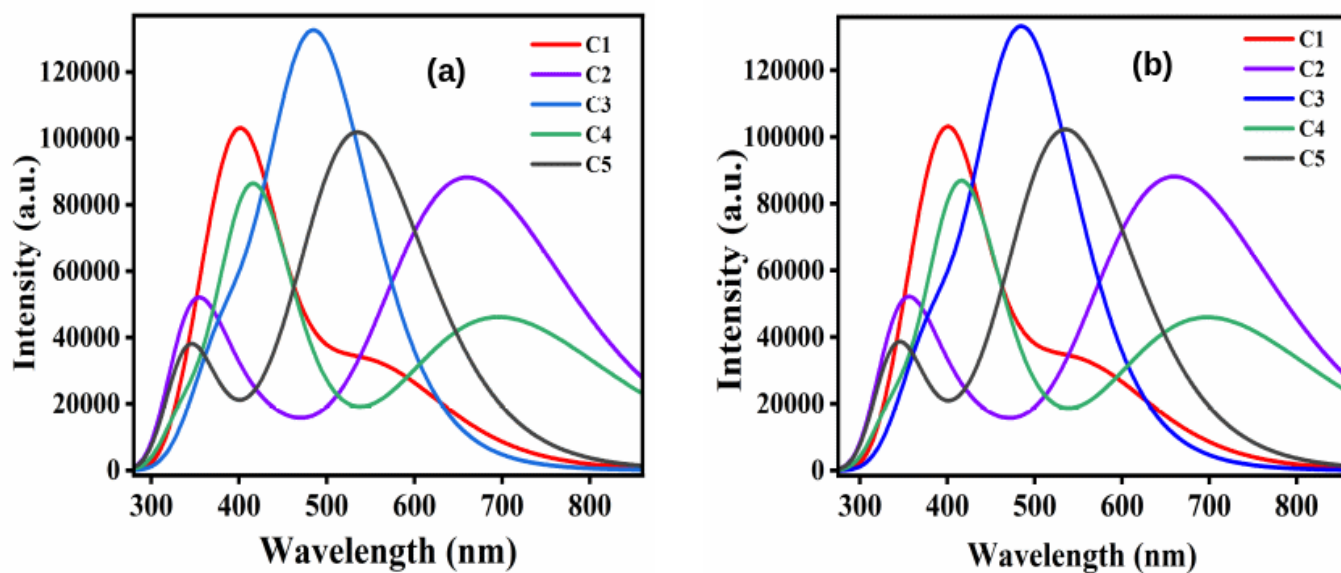

Fig. S3 : Absorption spectra of the studied compounds in (a) DCM phase and (b) ethanol phase.

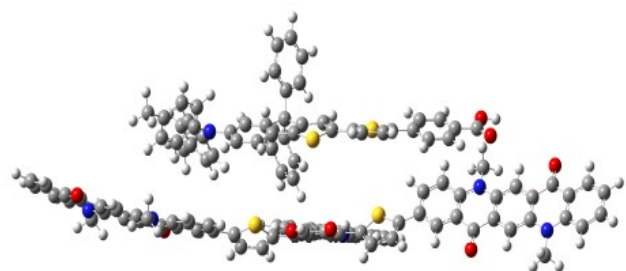

**Donor/C1**

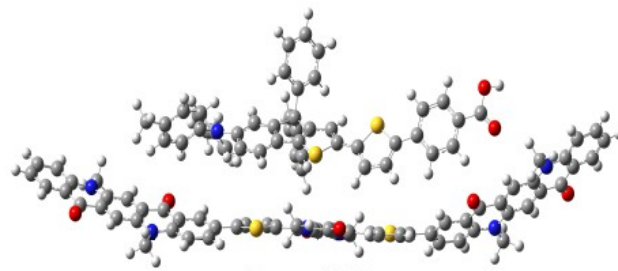

**Donor/C2**

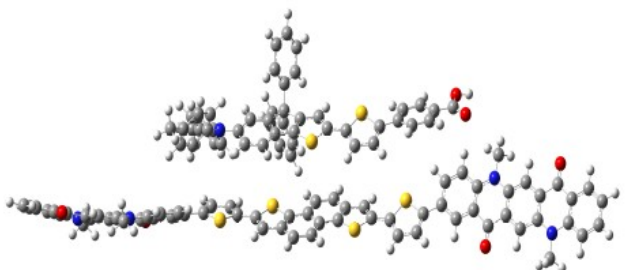

**Donor/C3**

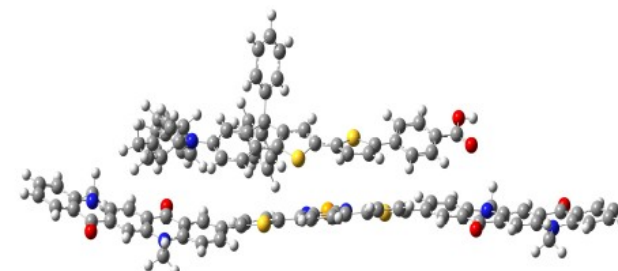

**Donor/C4**

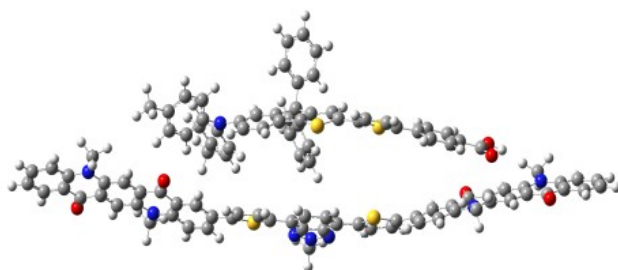

**Donor/C5**

Fig. S4 : Optimized structures of the A1/C1-C5 molecules.
